# Supplementary material for: Representativeness and optimal use of body mass index (BMI) in the UK Clinical Practice Research Datalink (CPRD)
Source: HighWire-hosted journal article supplement (doi:10.1136/bmjopen-2013-003389), 2013-09-01
Supplement: bmjopen-2013-003389supp_appendix.pdf [file bmjopen-2013-003389supp_appendix.pdf]

Appendix Table A1: Completeness of BMI data in CPRD, by age and calendar year (men and women combined)

|                        | 1990  | 1991  | 1992  | 1993   | 1994   | 1995   | 1996   | 1997   | 1998   | 1999   | 2000   | 2001   | 2002   | 2003   | 2004   | 2005   | 2006   | 2007   | 2008   | 2009   | 2010   | 2011   |
|------------------------|-------|-------|-------|--------|--------|--------|--------|--------|--------|--------|--------|--------|--------|--------|--------|--------|--------|--------|--------|--------|--------|--------|
| <b>16-24*</b>          |       |       |       |        |        |        |        |        |        |        |        |        |        |        |        |        |        |        |        |        |        |        |
| N registered           | 8009  | 10620 | 11423 | 12525  | 12959  | 13461  | 14711  | 17501  | 19447  | 23227  | 28581  | 31794  | 34452  | 36191  | 38017  | 39512  | 40433  | 41635  | 42546  | 42646  | 42216  | 41093  |
| BMI in previous 3y (%) | 11    | 20    | 26    | 32     | 34     | 35     | 32     | 28     | 25     | 24     | 23     | 24     | 25     | 26     | 27     | 28     | 30     | 32     | 32     | 34     | 33     | 32     |
| BMI any previous (%)   | 11    | 20    | 26    | 34     | 39     | 40     | 39     | 37     | 34     | 32     | 30     | 30     | 30     | 31     | 32     | 33     | 34     | 36     | 37     | 39     | 39     | 38     |
| <b>25-34</b>           |       |       |       |        |        |        |        |        |        |        |        |        |        |        |        |        |        |        |        |        |        |        |
| N registered           | 11065 | 15482 | 17477 | 20071  | 21596  | 22694  | 25023  | 29923  | 32560  | 37448  | 44253  | 46730  | 48659  | 48853  | 49901  | 50695  | 50271  | 50586  | 50413  | 50809  | 50435  | 50192  |
| BMI in previous 3y (%) | 15    | 27    | 37    | 44     | 46     | 47     | 43     | 39     | 36     | 35     | 34     | 35     | 36     | 38     | 41     | 42     | 45     | 47     | 49     | 51     | 50     | 50     |
| BMI any previous (%)   | 15    | 27    | 38    | 49     | 57     | 62     | 64     | 66     | 66     | 67     | 66     | 66     | 67     | 67     | 68     | 69     | 70     | 71     | 72     | 73     | 73     | 73     |
| <b>35-44</b>           |       |       |       |        |        |        |        |        |        |        |        |        |        |        |        |        |        |        |        |        |        |        |
| N registered           | 10912 | 14569 | 15953 | 18120  | 19383  | 20797  | 23403  | 28838  | 32305  | 38809  | 47168  | 51881  | 55991  | 58121  | 60408  | 61817  | 61912  | 61983  | 61014  | 59595  | 57197  | 54926  |
| BMI in previous 3y (%) | 15    | 26    | 36    | 44     | 45     | 45     | 41     | 36     | 32     | 30     | 29     | 29     | 31     | 33     | 36     | 38     | 41     | 44     | 46     | 48     | 47     | 47     |
| BMI any previous (%)   | 15    | 27    | 39    | 50     | 58     | 64     | 66     | 67     | 68     | 69     | 69     | 69     | 71     | 72     | 74     | 75     | 77     | 79     | 80     | 81     | 82     | 83     |
| <b>45-54</b>           |       |       |       |        |        |        |        |        |        |        |        |        |        |        |        |        |        |        |        |        |        |        |
| N registered           | 8732  | 12461 | 14507 | 17033  | 18662  | 20199  | 22946  | 27765  | 30629  | 35954  | 43045  | 45882  | 48093  | 49276  | 51084  | 52921  | 53519  | 54738  | 55564  | 56368  | 56266  | 56070  |
| BMI in previous 3y (%) | 17    | 29    | 39    | 47     | 47     | 47     | 42     | 37     | 33     | 31     | 30     | 30     | 32     | 34     | 38     | 41     | 44     | 48     | 50     | 51     | 50     | 50     |
| BMI any previous (%)   | 17    | 30    | 42    | 53     | 61     | 66     | 69     | 70     | 71     | 72     | 72     | 72     | 73     | 74     | 76     | 78     | 80     | 82     | 84     | 85     | 86     | 86     |
| <b>55-64</b>           |       |       |       |        |        |        |        |        |        |        |        |        |        |        |        |        |        |        |        |        |        |        |
| N registered           | 7613  | 10263 | 11680 | 13329  | 14310  | 15289  | 17178  | 20843  | 23615  | 28115  | 33854  | 38058  | 42258  | 44405  | 46749  | 48398  | 49162  | 49346  | 49380  | 49207  | 48077  | 46430  |
| BMI in previous 3y (%) | 17    | 31    | 42    | 51     | 52     | 51     | 45     | 40     | 37     | 35     | 34     | 35     | 37     | 40     | 45     | 48     | 51     | 56     | 57     | 58     | 56     | 57     |
| BMI any previous (%)   | 17    | 32    | 44    | 57     | 66     | 70     | 72     | 74     | 74     | 75     | 75     | 76     | 77     | 79     | 81     | 83     | 84     | 86     | 87     | 88     | 89     | 90     |
| <b>65-74</b>           |       |       |       |        |        |        |        |        |        |        |        |        |        |        |        |        |        |        |        |        |        |        |
| N registered           | 6715  | 9346  | 10678 | 12190  | 13128  | 13554  | 14900  | 17605  | 19246  | 22460  | 26600  | 28870  | 30997  | 31790  | 32914  | 33516  | 33402  | 33895  | 34508  | 35245  | 34845  | 35163  |
| BMI in previous 3y (%) | 14    | 26    | 36    | 45     | 47     | 47     | 42     | 37     | 35     | 34     | 33     | 35     | 40     | 45     | 52     | 56     | 61     | 65     | 67     | 67     | 66     | 67     |
| BMI any previous (%)   | 14    | 27    | 38    | 51     | 60     | 65     | 69     | 71     | 73     | 75     | 76     | 77     | 79     | 81     | 84     | 87     | 88     | 90     | 91     | 92     | 93     | 93     |
| <b>75+</b>             |       |       |       |        |        |        |        |        |        |        |        |        |        |        |        |        |        |        |        |        |        |        |
| N registered           | 5680  | 7796  | 8637  | 9926   | 10670  | 11852  | 13416  | 16005  | 17989  | 20997  | 25213  | 27585  | 29384  | 30016  | 31036  | 31849  | 32157  | 32484  | 32523  | 32507  | 32007  | 31621  |
| BMI in previous 3y (%) | 9     | 20    | 28    | 34     | 35     | 37     | 35     | 32     | 31     | 31     | 31     | 33     | 37     | 41     | 48     | 54     | 58     | 62     | 64     | 67     | 66     | 67     |
| BMI any previous (%)   | 9     | 20    | 28    | 37     | 43     | 49     | 53     | 56     | 59     | 61     | 63     | 65     | 69     | 72     | 76     | 80     | 83     | 85     | 87     | 89     | 90     | 91     |
| <b>Total</b>           |       |       |       |        |        |        |        |        |        |        |        |        |        |        |        |        |        |        |        |        |        |        |
| N registered           | 58726 | 80537 | 90355 | 103194 | 110708 | 117846 | 131577 | 158480 | 175791 | 207010 | 248714 | 270800 | 289834 | 298652 | 310109 | 318708 | 320856 | 324667 | 325948 | 326377 | 321043 | 315495 |
| BMI in previous 3y (%) | 14    | 26    | 35    | 43     | 45     | 45     | 40     | 36     | 33     | 31     | 31     | 31     | 34     | 36     | 40     | 43     | 46     | 50     | 51     | 52     | 52     | 52     |
| BMI any previous (%)   | 15    | 27    | 37    | 48     | 56     | 61     | 63     | 64     | 65     | 66     | 65     | 66     | 67     | 69     | 71     | 72     | 74     | 76     | 77     | 78     | 79     | 79     |

Appendix Table A2: Completeness of BMI data among patients with diagnoses of type 2 diabetes or mental health disorders, and among statin users

|      | Type 2 diabetes |                           | Schizophrenia/psychoses |                           | Statin users |                           |
|------|-----------------|---------------------------|-------------------------|---------------------------|--------------|---------------------------|
|      | N registered    | N with BMI in last 3y (%) | N registered            | N with BMI in last 3y (%) | N registered | N with BMI in last 3y (%) |
| 1990 | 542             | 172 (32)                  | 168                     | 32 (19)                   | 18           | 6 (33)                    |
| 1991 | 773             | 382 (49)                  | 234                     | 62 (26)                   | 63           | 27 (43)                   |
| 1992 | 987             | 558 (57)                  | 282                     | 108 (38)                  | 137          | 99 (72)                   |
| 1993 | 1239            | 849 (69)                  | 317                     | 133 (42)                  | 183          | 142 (78)                  |
| 1994 | 1400            | 1080 (77)                 | 352                     | 156 (44)                  | 233          | 174 (75)                  |
| 1995 | 1636            | 1311 (80)                 | 388                     | 184 (47)                  | 344          | 233 (68)                  |
| 1996 | 1991            | 1560 (78)                 | 423                     | 184 (43)                  | 692          | 408 (59)                  |
| 1997 | 2553            | 1982 (78)                 | 514                     | 181 (35)                  | 1296         | 688 (53)                  |
| 1998 | 3115            | 2421 (78)                 | 553                     | 184 (33)                  | 2152         | 1089 (51)                 |
| 1999 | 3988            | 3143 (79)                 | 652                     | 192 (29)                  | 3587         | 1781 (50)                 |
| 2000 | 5421            | 4263 (79)                 | 795                     | 237 (30)                  | 5736         | 2950 (51)                 |
| 2001 | 6797            | 5523 (81)                 | 830                     | 256 (31)                  | 8294         | 4607 (56)                 |
| 2002 | 8163            | 6873 (84)                 | 898                     | 310 (35)                  | 11797        | 7296 (62)                 |
| 2003 | 9232            | 8094 (88)                 | 954                     | 356 (37)                  | 15878        | 10925 (69)                |
| 2004 | 10612           | 9801 (92)                 | 1007                    | 450 (45)                  | 21415        | 16052 (75)                |
| 2005 | 11883           | 11307 (95)                | 1064                    | 555 (52)                  | 26398        | 20590 (78)                |
| 2006 | 12831           | 12358 (96)                | 1068                    | 637 (60)                  | 30977        | 24772 (80)                |
| 2007 | 13660           | 13186 (97)                | 1085                    | 742 (68)                  | 34751        | 28604 (82)                |
| 2008 | 14367           | 13906 (97)                | 1124                    | 813 (72)                  | 36781        | 30522 (83)                |
| 2009 | 15109           | 14648 (97)                | 1133                    | 854 (75)                  | 38942        | 32144 (83)                |
| 2010 | 15508           | 15019 (97)                | 1160                    | 872 (75)                  | 39499        | 32264 (82)                |
| 2011 | 15732           | 15224 (97)                | 1156                    | 898 (78)                  | 38959        | 31861 (82)                |

Appendix Table A3: Completeness of BMI data in UK databases.

| Database             | Calendar time-span | Completeness Information                                                                                                                                         |
|----------------------|--------------------|------------------------------------------------------------------------------------------------------------------------------------------------------------------|
| CPRD (current study) | 2005-2011          | 51% of patients had a BMI recorded in the last 3 years.<br><br>62% of newly registered patients had a BMI recorded by 12 months after registration in our study. |
| QResearch [21]       | 2001-2007          | By March 2007, 58% of registered patients had their BMI recorded in the past 5 years.                                                                            |
| THIN [22]            | 2004-2006          | 62% of patients had a height recording and 66% had a weight recording within 12 months of registration.                                                          |

Appendix Figure A1: Mean BMI over calendar time comparing those with BMI recorded in CPRD (English practices) with the Health Survey for England 2010 data, stratified by gender and age group

(a) Men

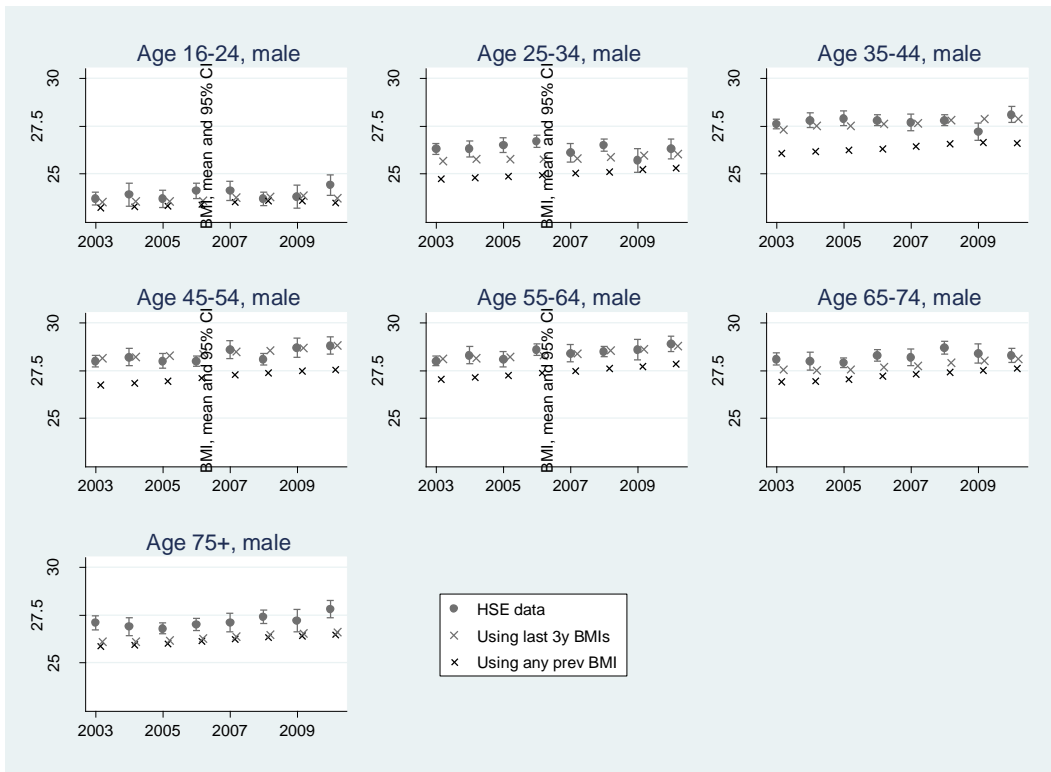

(b) Women

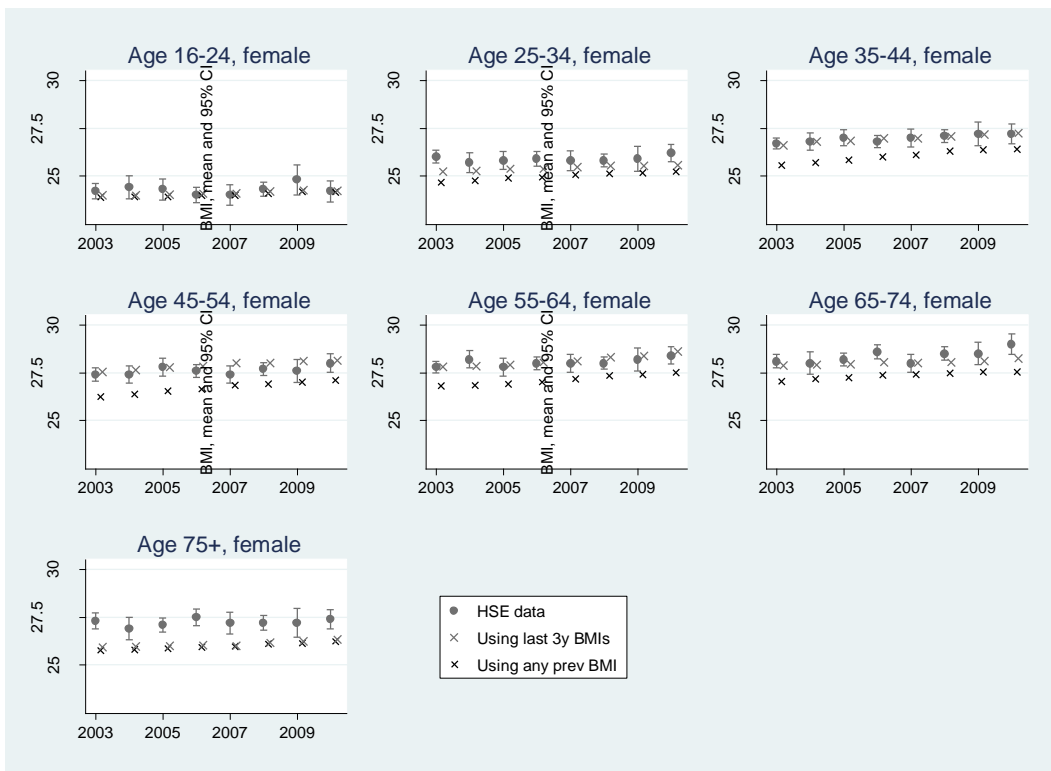

Appendix Figure A2: Percentage of individuals in CPRD (English practices) classified as obese (BMI $\geq$ 30kg/m<sup>2</sup>) compared with Health Survey for England data

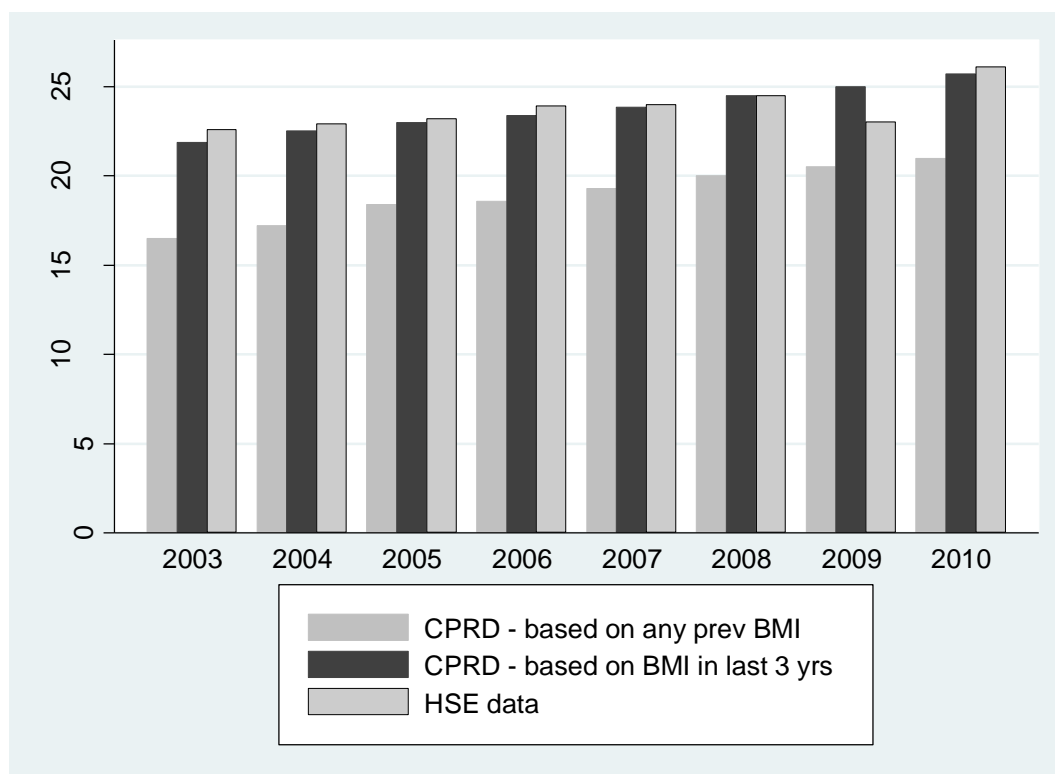

Notes:  
Proportions are age- and sex-standardised to the HSE population structure

Appendix Figure A3: Modelled change in BMI over time since BMI recording, by age and sex

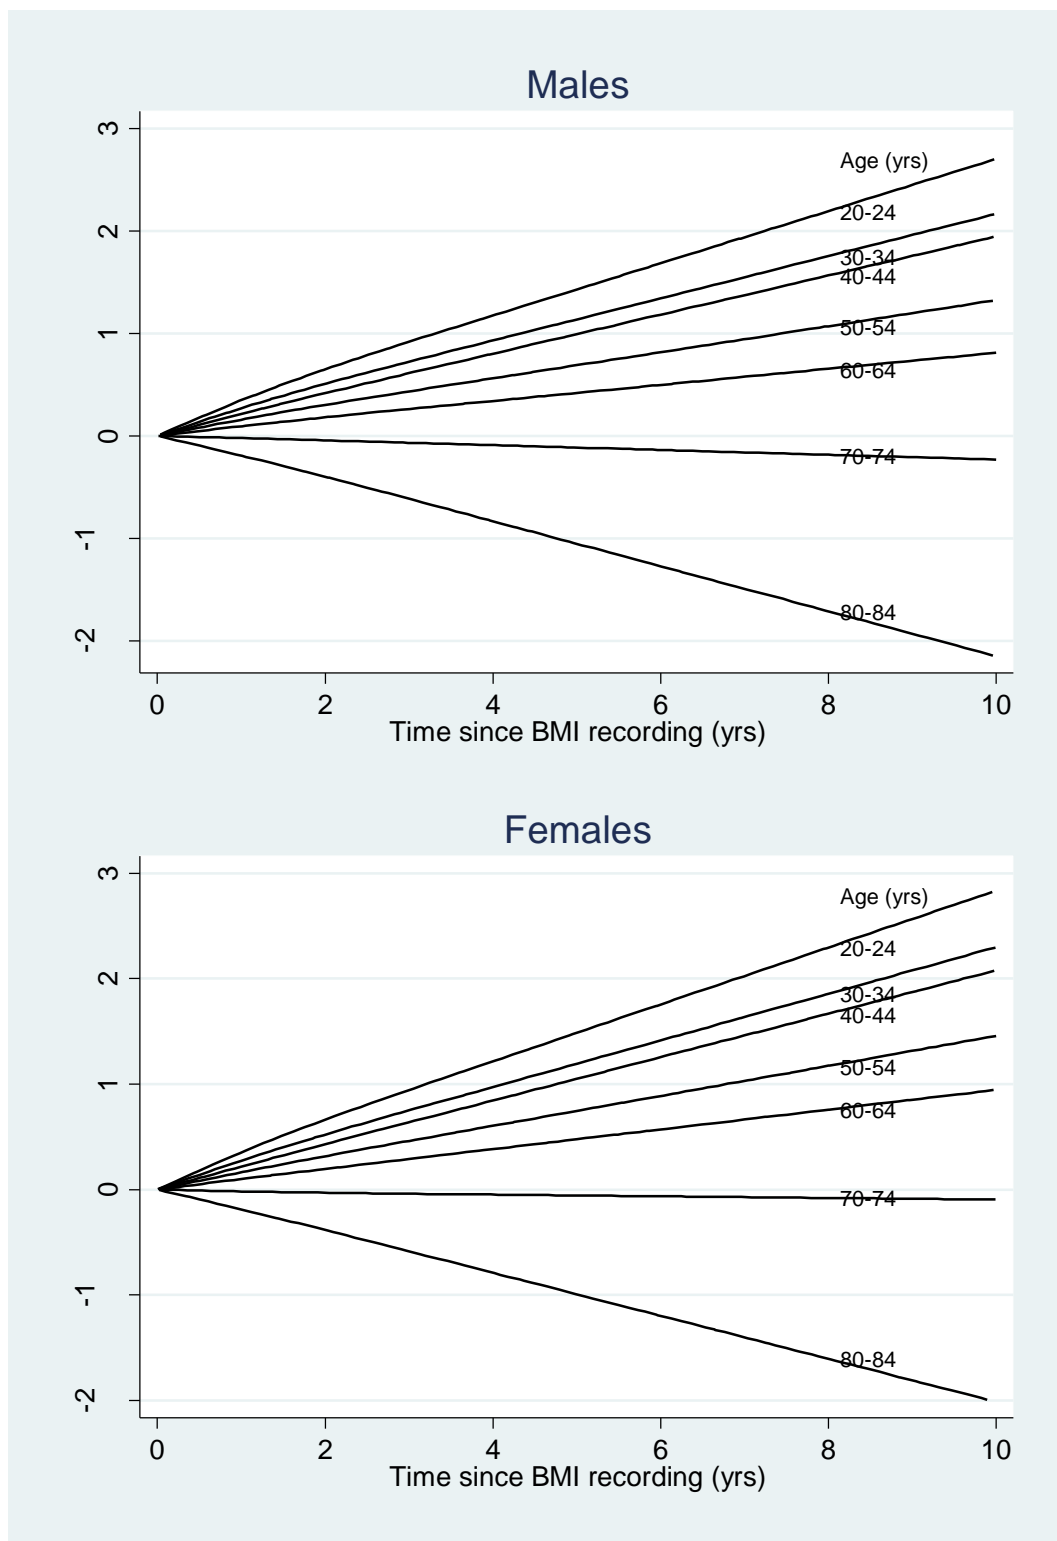

Notes:

- Based on a weighted least squares regression model for change in BMI with a 3 knot spline for time since BMI and interaction terms between spline terms and age/sex indicator variables (generating a separate modelled curve for each age/sex stratum). No constant term was included, to ensure that predicted change in BMI at time zero would be zero.
- For clarity, only selected age groups are shown in the Figure; the model also included the age groups 16-19, 25-29, 35-39, 45-49, 55-59, 65-69, 75-79, 85-89, 90+ years.
